# Supplementary material for: Cation-disorder zinc blende Zn0.5Ge0.5P compound and Zn0.5Ge0.5P–TiC–C composite as high-performance anodes for Li-ion batteries
Source: Royal Society of Chemistry journal article supplement (doi:10.1039/d0ta10521j), 2021-01-01
Supplement: d0ta10521j1.pdf [file d0ta10521j1.pdf]

## Supporting Information

### Cation-disorder zinc blende $\text{Zn}_{0.5}\text{Ge}_{0.5}\text{P}$ compound and $\text{Zn}_{0.5}\text{Ge}_{0.5}\text{P-TiC-C}$ composite as high-performance anodes for Li-ion batteries

Guoping Liu,<sup>‡ a, c</sup> Lei Zhang,<sup>‡ b</sup> Yucun Zhou,<sup>b</sup> Luke Soule,<sup>b</sup> Yangchang Mu,<sup>a</sup> Wenwu Li<sup>a,\*</sup> and Zhicong Shi<sup>a,\*</sup>

<sup>a</sup> School of Materials and Energy, Guangdong University of Technology, Guangzhou 510006, PR China

<sup>b</sup> School of Materials Science and Engineering, Georgia Institute of Technology, Atlanta, GA 30332, USA

<sup>c</sup> College of Mechanical and Automotive Engineering, Zhaoqing University, PR China

\* Corresponding author

E-mail: wenwuli@gdut.edu.cn (W. Li), zhicong@gdut.edu.cn (Z. Shi)

<sup>‡</sup> G. Liu and L. Zhang contributed equally to this work.

### First principles calculation details

First principles calculations of  $\text{Zn}_{0.5}\text{Ge}_{0.5}\text{P}$  and  $\text{ZnGeP}_2$  were conducted in the Vienna ab initio simulation package.<sup>1</sup> Generalized gradient approximation (GGA) function parameterized by Perdew–Burke–Ernzerhof (PBE) was applied to describe the exchange correlation potential.<sup>2</sup> The core-electrons were kept frozen in the form of a projector augmented wave function, with the valence electron configuration for P  $3s^23p^3$ , Ge  $3s^23p^2$ , and Zn  $3d^{10}4s^2$ . A  $4 \times 4 \times 4$  Monkhorst–Pack reciprocal grid, together with a 400 eV energy cutoff, was used for sufficient energy calculations.<sup>3</sup> Gaussian smearing with a smearing width of 0.05 eV was applied to accelerate the computation of the electronic energy near the Fermi level.

### calculation details of lithium-ion diffusion coefficient ( $D_{Li}$ )

$D_{Li}$  is calculated using:

$$D_{Li} = \frac{4}{\pi} \left( \frac{IV_m}{Z_A FS} \right)^2 \left[ \frac{dE(\delta)}{d\delta} / \frac{dE(t)}{d\sqrt{t}} \right]^2, \quad (t \ll L^2/D_{Li})$$

Where  $I$  is the applied current,  $V_M$  is the molar volume of  $\text{Zn}_{0.5}\text{Ge}_{0.5}\text{P}$ ,  $Z_A$  is the charge number of the electroactive species ( $Z_A = 1$  for  $D_{Li}$ ),  $F$  is the Faraday constant,  $S$  is the area between the electrode and the electrolyte,  $\delta$  is the moles of lithium per mole electrode (e.g.,  $\delta$  in the term  $\text{Li}_\delta\text{Zn}_{0.5}\text{Ge}_{0.5}\text{P}$ ),  $t$  is the time duration of the current pulse, and  $L$  is the characteristic length of the electrode. The value  $dE(\delta)/d\delta$  is obtained by measuring the change in the equilibrium electrode potential after each current pulse. The value  $dE(t)/dt^{1/2}$  is determined from the voltage response curve measured during the current pulse of the GITT test.

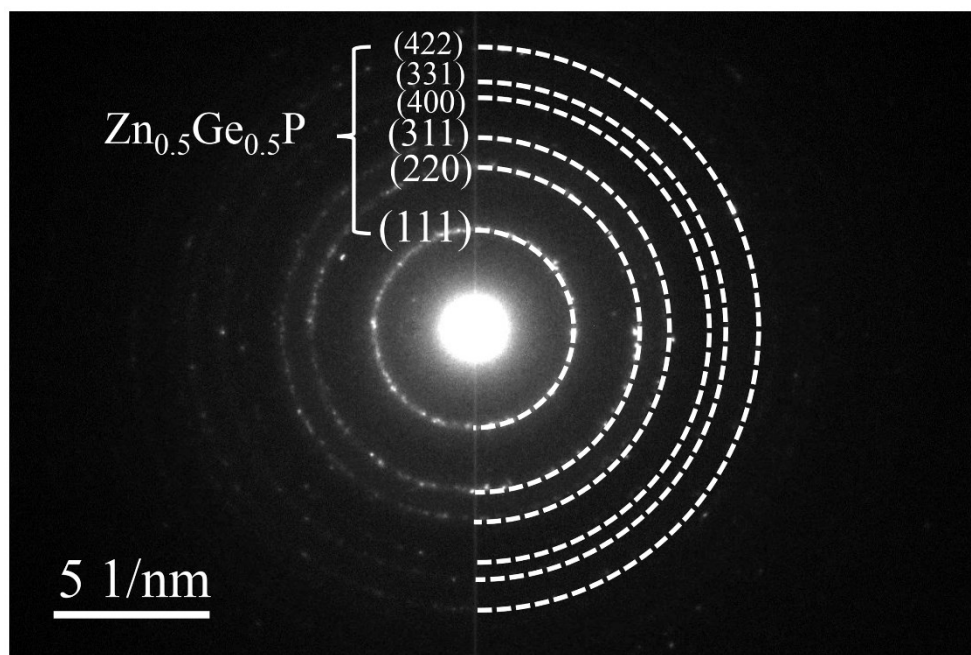

**Fig. S1** Selected-area electron diffraction (SAED) pattern of the as-synthesized Zinc blende  $\text{Zn}_{0.5}\text{Ge}_{0.5}\text{P}$  compound.

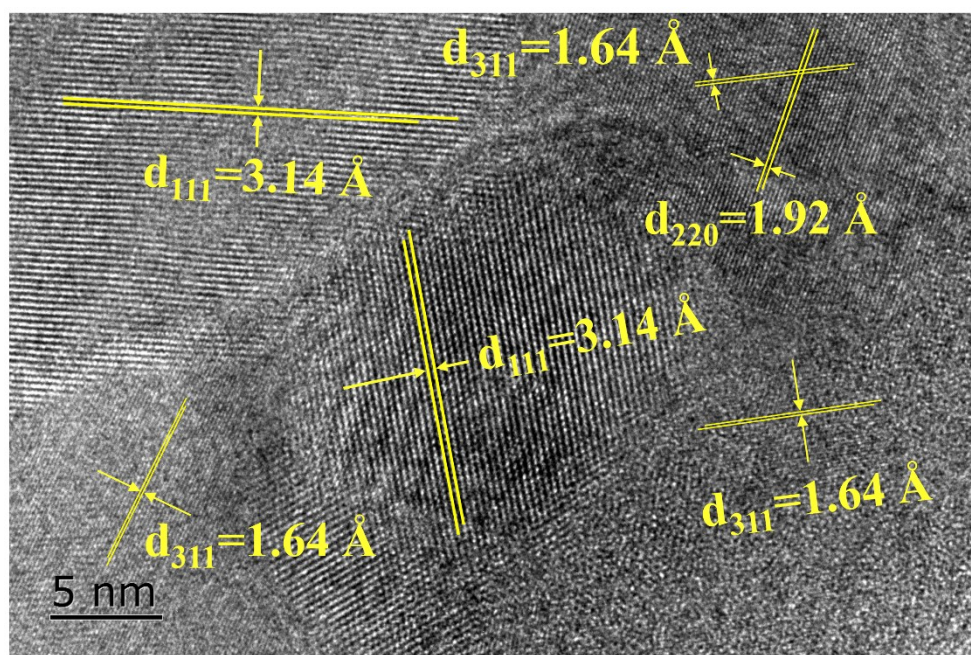

**Fig. S2.** HRTEM image of the synthesized Zinc blende  $\text{Zn}_{0.5}\text{Ge}_{0.5}\text{P}$  with interplanar spacing identified.

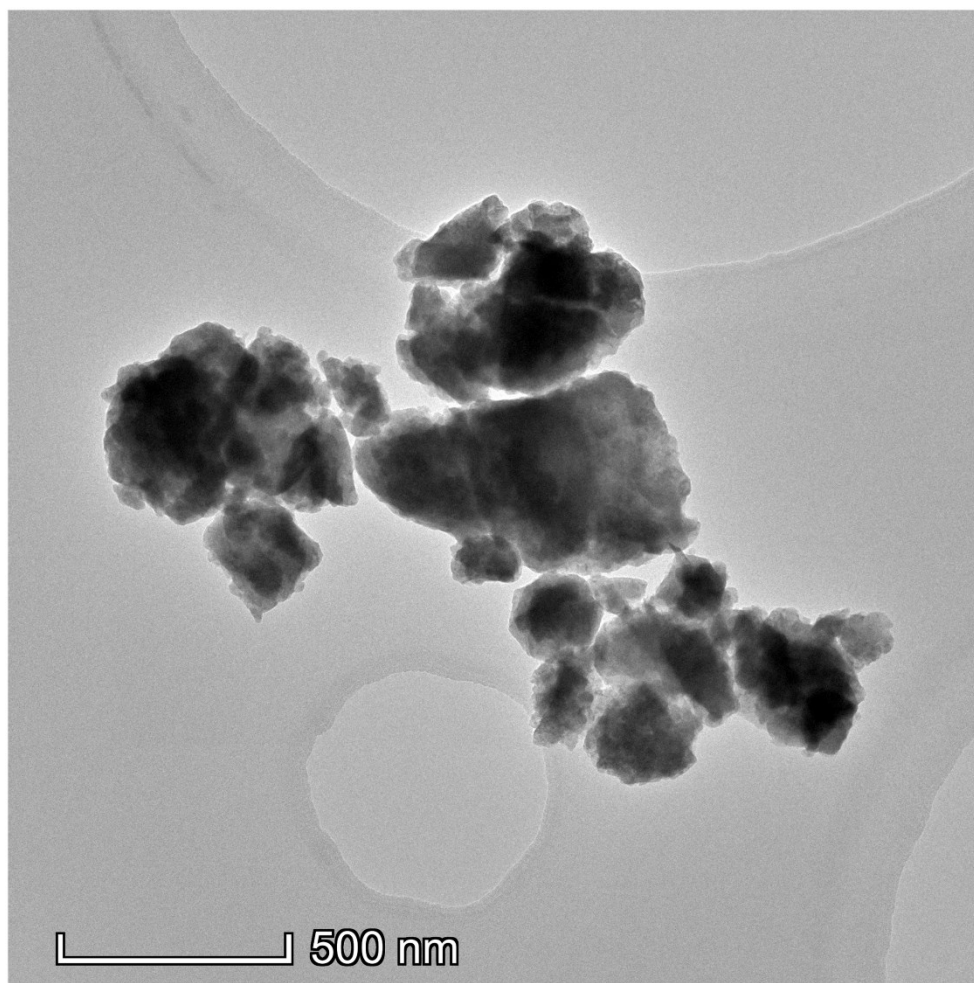

**Fig. S3.** Low-magnification TEM image of the synthesized Zinc blende  $\text{Zn}_{0.5}\text{Ge}_{0.5}\text{P}$  compound.

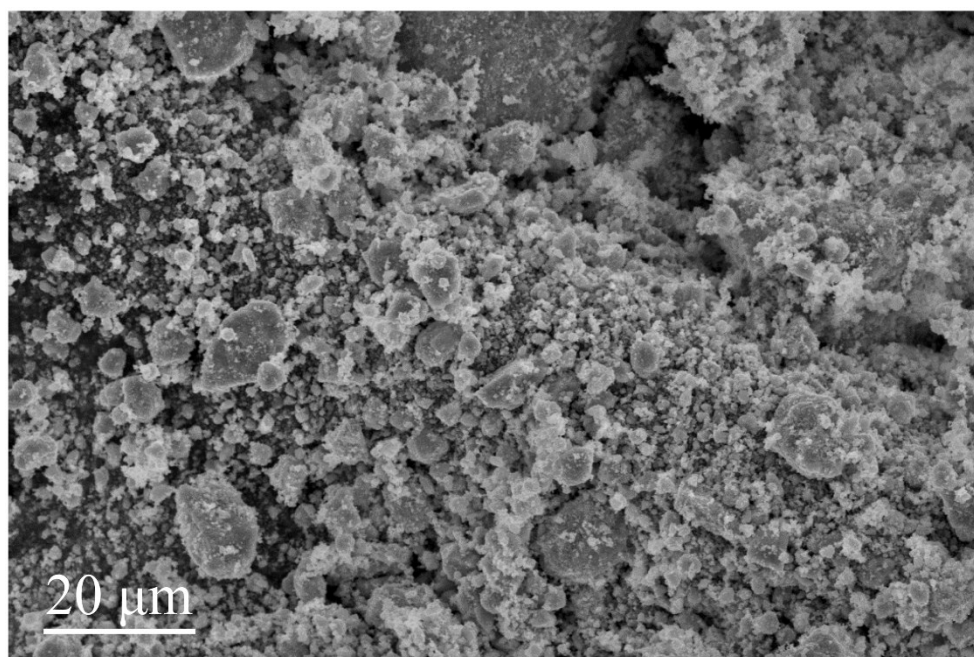

**Fig. S4.** Low-magnification SEM image of the synthesized Zinc blende  $\text{Zn}_{0.5}\text{Ge}_{0.5}\text{P}$  compound.

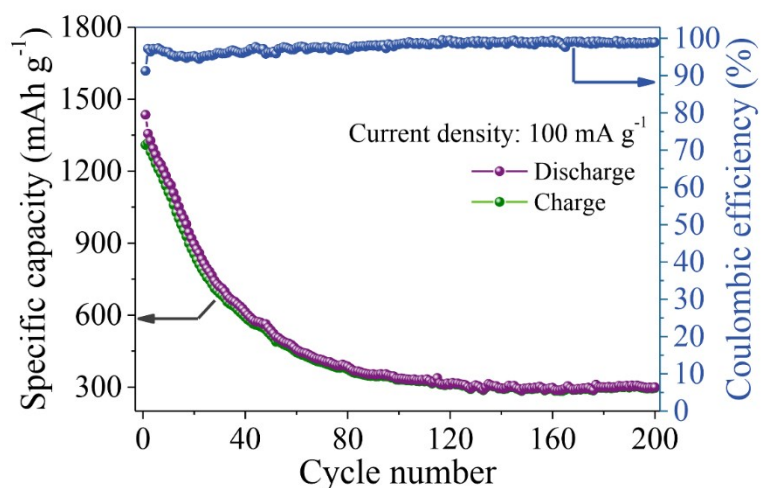

**Fig. S5.** Cycle performance of the as-synthesized  $\text{Zn}_{0.5}\text{Ge}_{0.5}\text{P}$  electrode at  $100 \text{ mA g}^{-1}$ .

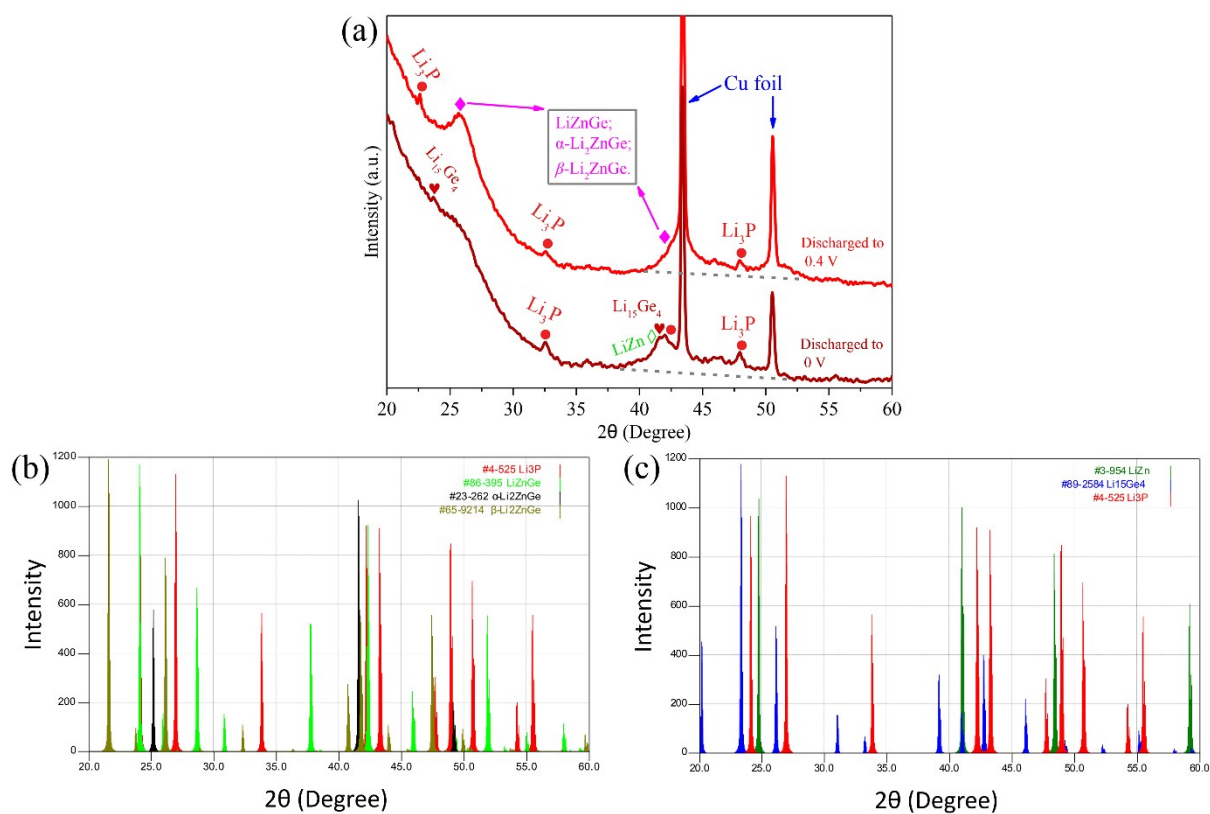

**Fig. S6.** (a) Magnified XRD results of discharged to 0.4 V and 0 V. (b) Standard diffraction peaks of phases at 0.4 V ( $\text{Li}_3\text{P}$ ,  $\text{LiZnGe}$ ,  $\alpha\text{-Li}_2\text{ZnGe}$ , and  $\beta\text{-Li}_2\text{ZnGe}$ ) and (c) 0 V ( $\text{LiZn}$ ,  $\text{Li}_3\text{P}$ ,  $\text{Li}_5\text{Ge}_4$ ).



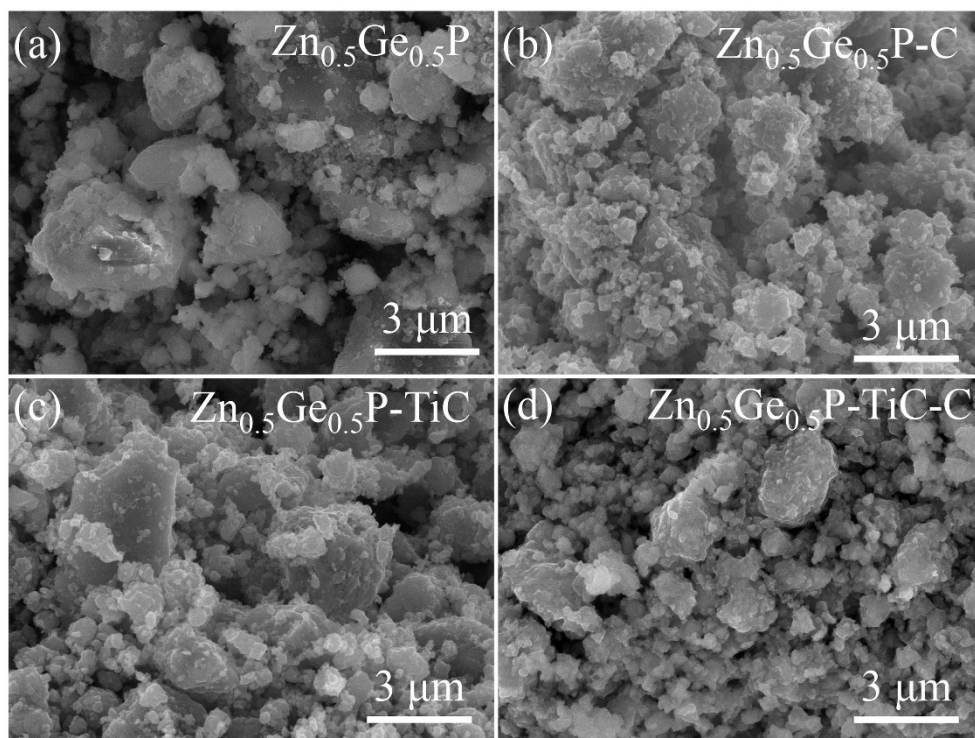

**Fig. S7.** SEM images of (a) the as-synthesized Zinc blende  $\text{Zn}_{0.5}\text{Ge}_{0.5}\text{P}$  compound, (b)  $\text{Zn}_{0.5}\text{Ge}_{0.5}\text{P-C}$  composite, (c)  $\text{Zn}_{0.5}\text{Ge}_{0.5}\text{P-TiC}$  composite, and (d)  $\text{Zn}_{0.5}\text{Ge}_{0.5}\text{P-TiC-C}$  composite.

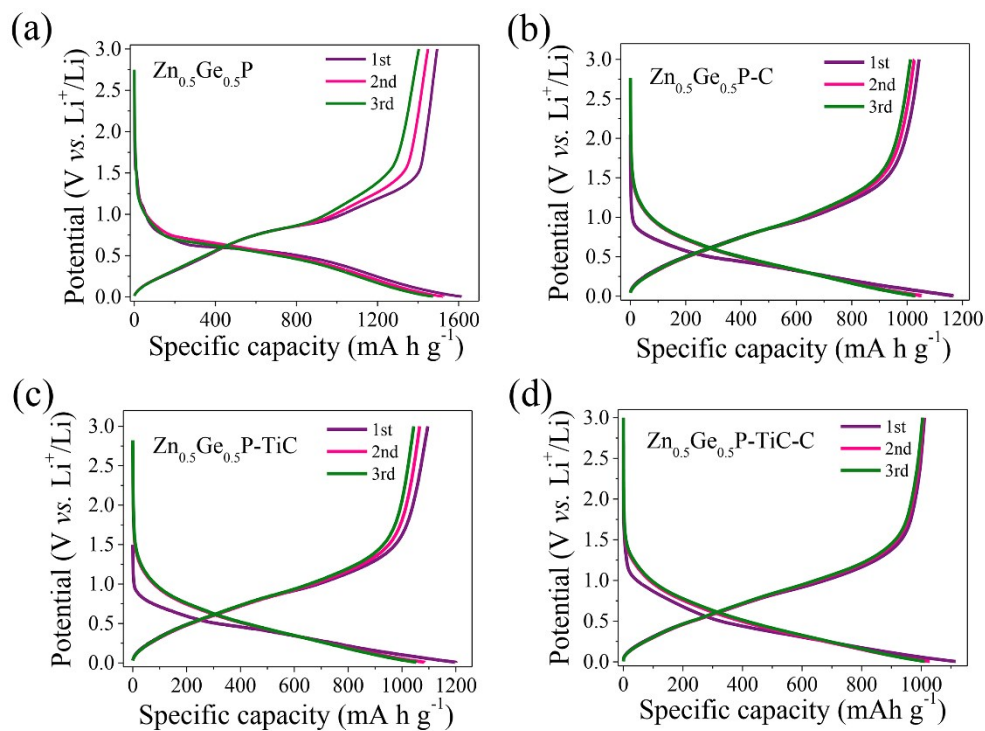

**Fig. S8.** Initial three discharge-charge profiles of (a) Zinc blende  $\text{Zn}_{0.5}\text{Ge}_{0.5}\text{P}$  compound, (b)  $\text{Zn}_{0.5}\text{Ge}_{0.5}\text{P-C}$  composite, (c)  $\text{Zn}_{0.5}\text{Ge}_{0.5}\text{P-TiC}$  composite, and (d)  $\text{Zn}_{0.5}\text{Ge}_{0.5}\text{P-TiC-C}$  composite electrodes at a current density of  $100 \text{ mA g}^{-1}$ .

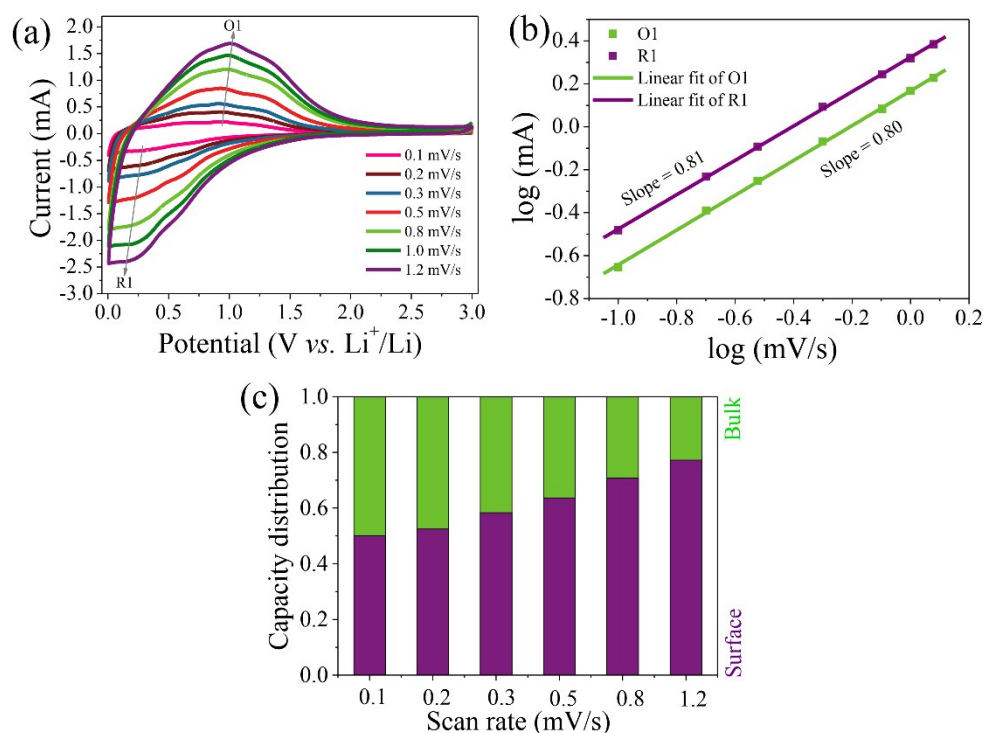

**Fig. S9.** (a) CV curves at different scan rates of the  $\text{Zn}_{0.5}\text{Ge}_{0.5}\text{P-TiC-C}$  electrode. (b) Relationship between logarithm cathodic and anodic peak current and logarithm scan rates. (c) Normalized contribution ratio of capacitive contribution diffusion contribution at different scan rates.

## References

1. G. Kresse and J. Furthmüller, *Physical Review B*, 1996, 54, 11169-11186.
2. J. P. Perdew, K. Burke and M. Ernzerhof, *Phys. Rev. Lett.*, 1996, 77, 3865.
3. J. D. Pack and H. J. Monkhorst, *Physical Review B*, 1977, 16, 1748.
